# Supplementary material for: Development and evaluation of a high-fidelity lactation simulation model for health professional breastfeeding education
Source: Springer Nature journal article supplement (doi:10.1186/s13006-020-0254-5), 2020-02-17
Supplement: MOESM4 [file 17715878]

### **Instructions**

Thank you for agreeing to provide feedback and evaluate the LiquidGoldConcept Lactation Simulation Models.

The study coordinator has assigned a study identification number to you.

You have been randomly assigned to evaluate **either** LSMs #1 and #2 **or** LSMs #3 and #4.

It will take you between 30 and 40 minutes to complete this survey packet.

The study coordinator cannot answer questions about the look, feel, or realism of the LSM. She/he can only provide information about the study logistics and/or clarify instructions.

**Would like to be included in the LiquidGoldConcept, Inc. mailing list to receive information about curricular materials, research studies, and discounts?**

- Yes
- No

**Section 1. Demographics and Breastfeeding Background**

1. **How do you self-identify?**  Male  Female  Other \_\_\_\_\_
  
2. **What is your age?** \_\_\_\_\_
  
3. **What is your profession (choose all that apply)?**
  - MD/DO/MBBS or equivalent
  - Physician assistant
  - Advanced practice nurse or equivalent
  - IBCLC
  - Other: \_\_\_\_\_
  
4. **What is your specialty?**
  - Pediatrics
  - Obstetrics and gynecology
  - Family medicine
  - Internal medicine
  - Emergency medicine
  - Surgery
  - Midwifery
  - Other \_\_\_\_\_
  
5. **Are you still in residency training?**
  - Yes
  - No
  
6. **Where do you practice?**
  - United States (State: \_\_\_\_\_)
  - Canada (Province: \_\_\_\_\_)
  
7. **Do you practice at an academic/teaching center?**
  - Yes
  - No
  
8. **How many years of practice in breastfeeding medicine?** \_\_\_\_\_

**9. Did you obtain additional certification or training to work in breastfeeding medicine?**

- No
- Yes, please mark all that apply:
  - FABM
  - IBCLC
  - Certified lactation counselor, educator, or equivalent
  - I am currently working toward IBCLC/CLC/equivalent
  - Other: \_\_\_\_\_

**10. Do you have personal experience with breastfeeding?**

- No
- Yes, I have previously breastfed.
- Yes, I have assisted my partner with breastfeeding.
- Other: \_\_\_\_\_

**11. What percentage of your practice is with breastfeeding mothers?**

- 0-24%
- 25-49%
- 50-74%
- 75-100%
- Don't know.

**12. Approximately what percentage of your breastfeeding patient population is white, non-Hispanic?**

- 0-24%
- 25-49%
- 50-74%
- 75-100%
- Don't know.

**13. Have you worked with a breast model/simulator before?**

- No
- If yes, circle the breast model(s)/simulator(s) you have worked with before. *If the breast model/simulator is not pictured below, please, describe the product you worked with to the best of your ability in the box on the right.*

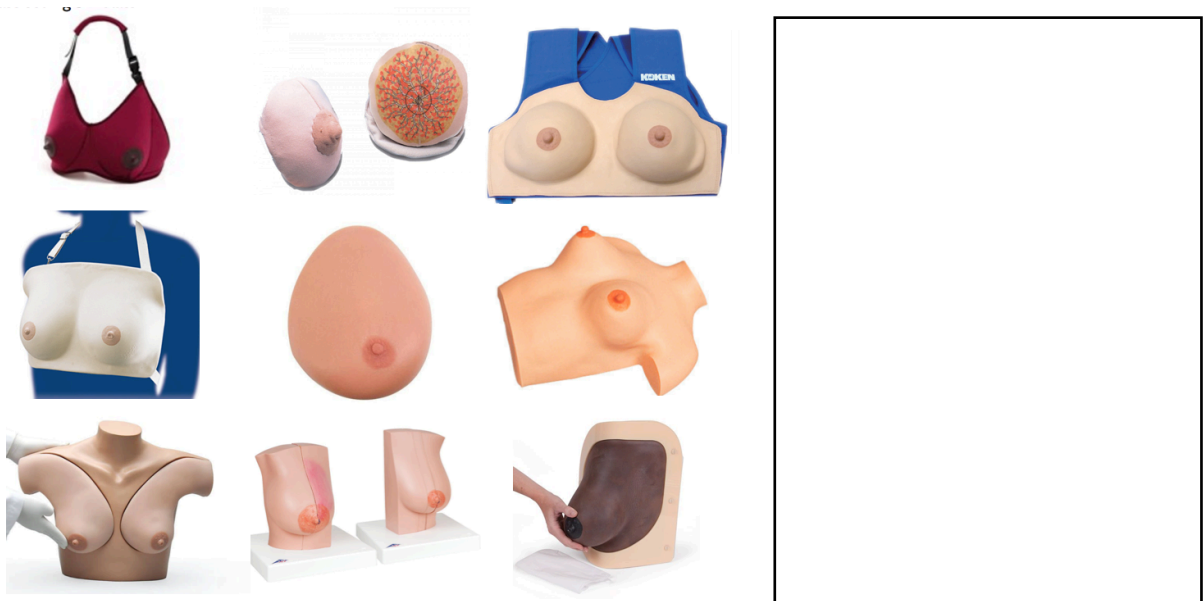

**14. Have you seen the LiquidGoldConcept Lactation Simulation Model before?**

- No
- If yes, please, explain: \_\_\_\_\_

**STOP. Turn in this Questionnaire Packet (Section 1) to the study coordinator.**

**Section 2a. Breast Exam and Documentation of Findings**

***You are now evaluating LSM # \_\_\_\_\_. Please, confirm that this is the LSM you are working with.***

**Instructions. Perform a breast exam.** Use the figure below to document your findings. **Write down your top differential diagnosis** for each finding. Findings can be dermatological, surgical, deep tissue, anatomical, etc. *Make every effort to draw true to scale.*

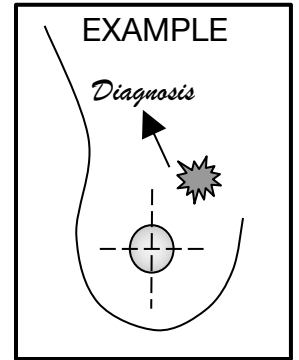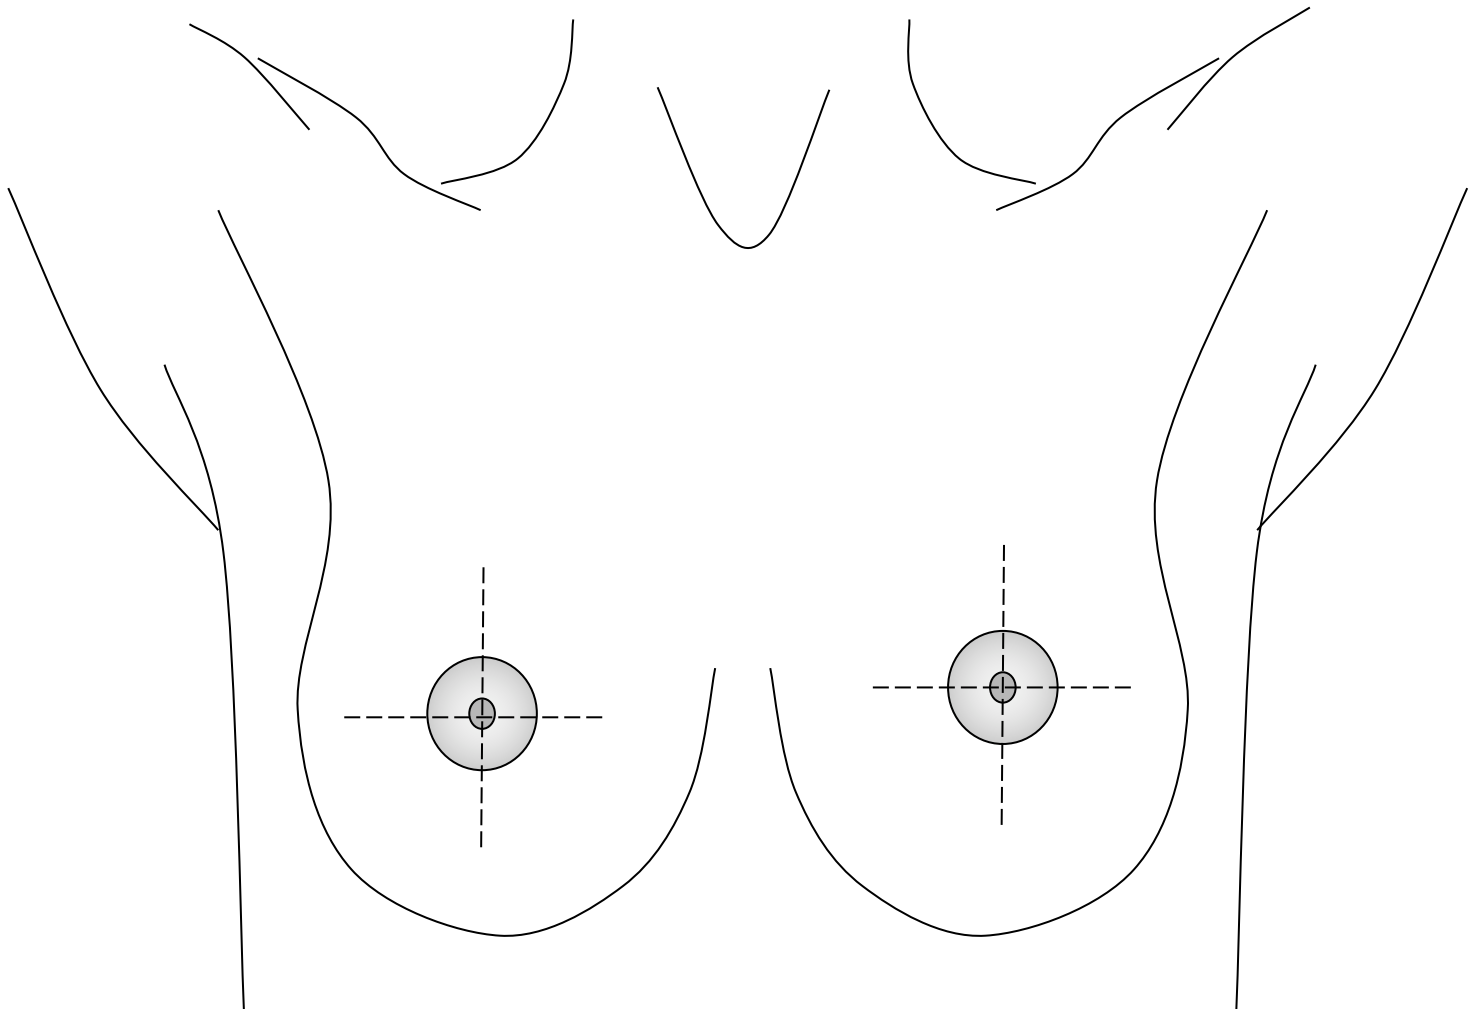

**STOP. Turn this page in to the study coordinator. Then, proceed to the next section (Section 2a) of the survey.**

**Section 2b. Validation of the LSM Look, Feel, Pathologies, and Realism**

***You are evaluating LSM # \_\_\_\_\_. Please, confirm that this is the LSM you are working with.***

**Do you agree with the following statements? Use scale provided below.**

|                   |          |                   |                  |                |       |                |
|-------------------|----------|-------------------|------------------|----------------|-------|----------------|
| 1                 | 2        | 3                 | 4                | 5              | 6     | 7              |
| Strongly disagree | Disagree | Somewhat Disagree | Neither/Not sure | Somewhat Agree | Agree | Strongly Agree |

| Statements                                            | 1 | 2 | 3 | 4 | 5 | 6 | 7 |
|-------------------------------------------------------|---|---|---|---|---|---|---|
| <b>General Look and Feel of LSM</b>                   |   |   |   |   |   |   |   |
| 1. The LSM looks like a breastfeeding mother's chest. |   |   |   |   |   |   |   |
| 2. The breast size looks realistic.                   |   |   |   |   |   |   |   |
| 3. The breast shape looks realistic.                  |   |   |   |   |   |   |   |
| 4. The skin color looks realistic.                    |   |   |   |   |   |   |   |
| 5. The skin feels realistic.                          |   |   |   |   |   |   |   |
| <b>Right Breast Look and Feel</b>                     |   |   |   |   |   |   |   |
| 1. The right areolar color looks realistic.           |   |   |   |   |   |   |   |
| 2. The right areolar shape looks realistic.           |   |   |   |   |   |   |   |
| 3. The right areolar size looks realistic.            |   |   |   |   |   |   |   |
| 4. The right nipple color looks realistic.            |   |   |   |   |   |   |   |
| 5. The right nipple feels realistic.                  |   |   |   |   |   |   |   |
| 6. The right nipple shape is realistic.               |   |   |   |   |   |   |   |
| 7. The right nipple size is realistic.                |   |   |   |   |   |   |   |
| 8. The right breast feels realistic.                  |   |   |   |   |   |   |   |
| <b>Left Breast Look and Feel</b>                      |   |   |   |   |   |   |   |
| 1. The left areolar color looks realistic.            |   |   |   |   |   |   |   |
| 2. The left areolar shape looks realistic.            |   |   |   |   |   |   |   |
| 3. The left areolar size looks realistic.             |   |   |   |   |   |   |   |
| 4. The left nipple color looks realistic.             |   |   |   |   |   |   |   |
| 5. The left nipple feels realistic.                   |   |   |   |   |   |   |   |
| 6. The left nipple shape is realistic.                |   |   |   |   |   |   |   |
| 7. The left nipple size is realistic.                 |   |   |   |   |   |   |   |
| 8. The left breast feels realistic.                   |   |   |   |   |   |   |   |

|                   |          |                   |                  |                |       |                |
|-------------------|----------|-------------------|------------------|----------------|-------|----------------|
| 1                 | 2        | 3                 | 4                | 5              | 6     | 7              |
| Strongly disagree | Disagree | Somewhat Disagree | Neither/Not sure | Somewhat Agree | Agree | Strongly Agree |

| Statements about Realism of Pathologies                              | 1 | 2 | 3 | 4 | 5 | 6 | 7 |
|----------------------------------------------------------------------|---|---|---|---|---|---|---|
| 1. The plugged duct(s) in the <u>left</u> breast feel(s) realistic.  |   |   |   |   |   |   |   |
| 2. The plugged duct(s) in the <u>right</u> breast feel(s) realistic. |   |   |   |   |   |   |   |
| 3. The mastitis looks realistic.                                     |   |   |   |   |   |   |   |
| 4. The Montgomery glands look realistic.                             |   |   |   |   |   |   |   |
| 5. The damage on the left nipple looks realistic.                    |   |   |   |   |   |   |   |

| Realism of Breastfeeding Techniques and Experience                                                                         | 1 | 2 | 3 | 4 | 5 | 6 | 7 |
|----------------------------------------------------------------------------------------------------------------------------|---|---|---|---|---|---|---|
| <b>Instructions: Put on the LSM.<br/>The study coordinator can help you with adjustment of straps.</b>                     |   |   |   |   |   |   |   |
| Putting on the LSM is intuitive.                                                                                           |   |   |   |   |   |   |   |
| Wearing the LSM is comfortable.                                                                                            |   |   |   |   |   |   |   |
| The weight of the LSM is appropriate.                                                                                      |   |   |   |   |   |   |   |
| <b>Instructions: Set the timer for 15 seconds.<br/>Hand express colostrum from the <i>right</i> breast into the spoon.</b> |   |   |   |   |   |   |   |
| The amount of simulated colostrum I hand expressed in 15 seconds is realistic.                                             |   |   |   |   |   |   |   |
| The way that simulated colostrum comes out of the nipple is realistic.                                                     |   |   |   |   |   |   |   |
| <b>Instructions: Set the timer for 15 seconds.<br/>Hand express colostrum from the <i>left</i> breast into the spoon.</b>  |   |   |   |   |   |   |   |
| The amount of simulated colostrum I hand expressed in 15 seconds is realistic                                              |   |   |   |   |   |   |   |
| The way that simulated colostrum comes out of the nipple is realistic.                                                     |   |   |   |   |   |   |   |

|                   |          |                   |                  |                |       |                |
|-------------------|----------|-------------------|------------------|----------------|-------|----------------|
| 1                 | 2        | 3                 | 4                | 5              | 6     | 7              |
| Strongly disagree | Disagree | Somewhat Disagree | Neither/Not sure | Somewhat Agree | Agree | Strongly Agree |

**Instructions: Use the breast pump to express colostrum from the *right* breast.**

What flange size did you use? *Write number to the right* →

At what setting did you set the pump to observe a realistic movement of breast tissue? Please, describe.

| Statements                                                         | 1 | 2 | 3 | 4 | 5 | 6 | 7 |
|--------------------------------------------------------------------|---|---|---|---|---|---|---|
| The way the breast tissue moves into the breast pump is realistic. |   |   |   |   |   |   |   |
| The way simulated colostrum comes out of the breast is realistic.  |   |   |   |   |   |   |   |

**Instructions: Use the breast pump to express colostrum from the *left* breast.**

What flange size did you use? *Write number to the right* →

At what setting did you set the pump to observe a realistic movement of breast tissue? Please, describe.

| Statements                                                         | 1 | 2 | 3 | 4 | 5 | 6 | 7 |
|--------------------------------------------------------------------|---|---|---|---|---|---|---|
| The way the breast tissue moves into the breast pump is realistic. |   |   |   |   |   |   |   |
| The way simulated colostrum comes out of the breast is realistic.  |   |   |   |   |   |   |   |

**Instructions: Engorge *both* breasts using the black bulbs hanging from the LSM by twisting the knob clockwise. Hand express colostrum from *both* breasts. No need to set a timer.**

| Statements                                                                                                       | 1 | 2 | 3 | 4 | 5 | 6 | 7 |
|------------------------------------------------------------------------------------------------------------------|---|---|---|---|---|---|---|
| The engorgement looks realistic.                                                                                 |   |   |   |   |   |   |   |
| The engorgement feels realistic.                                                                                 |   |   |   |   |   |   |   |
| The way that simulated colostrum comes out of the <i>engorged right</i> breast when I hand express is realistic. |   |   |   |   |   |   |   |
| The way that simulated colostrum comes out of the <i>engorged left</i> breast when I hand express is realistic.  |   |   |   |   |   |   |   |



|                   |          |                   |                  |                |       |                |
|-------------------|----------|-------------------|------------------|----------------|-------|----------------|
| 1                 | 2        | 3                 | 4                | 5              | 6     | 7              |
| Strongly disagree | Disagree | Somewhat Disagree | Neither/Not sure | Somewhat Agree | Agree | Strongly Agree |

| <b>Instructions: Remove the LSM and complete the rest of the questionnaire.</b> |   |   |   |   |   |   |   |
|---------------------------------------------------------------------------------|---|---|---|---|---|---|---|
| <b>Realism of Experience (continued)</b>                                        | 1 | 2 | 3 | 4 | 5 | 6 | 7 |
| Removing the LSM from my body is intuitive.                                     |   |   |   |   |   |   |   |
| The LSM allowed me to practice correct positioning and movement of my hands.    |   |   |   |   |   |   |   |
| <b>This</b> LSM is a useful tool for health professional student education.     |   |   |   |   |   |   |   |
| <b>This</b> LSM is a useful tool for hospital staff education.                  |   |   |   |   |   |   |   |
| <b>This</b> LSM is a useful tool for patient education.                         |   |   |   |   |   |   |   |

What features/improvements should be incorporated into LSM (# \_\_\_\_\_)?

What did you like about this LSM (# \_\_\_\_\_)?

What did you dislike about this LSM (# \_\_\_\_\_)?

**STOP. Turn in this questionnaire packet (Section 2b) to the study coordinator before proceeding to the next LSM.**

**Section 3a. Breast Exam and Documentation of Findings**

***You are now evaluating LSM # \_\_\_\_\_. Please, confirm that this is the LSM you are working with.***

**Instructions. Perform a breast exam.** Use the figure below to document your findings. **Write down your top differential diagnosis** for each finding. Findings can be dermatological, surgical, deep tissue, anatomical, etc. *Make every effort to draw true to scale.*

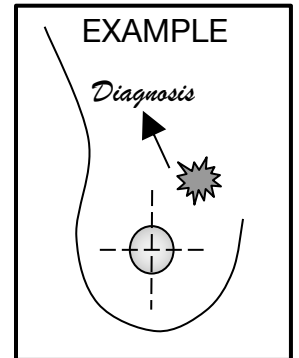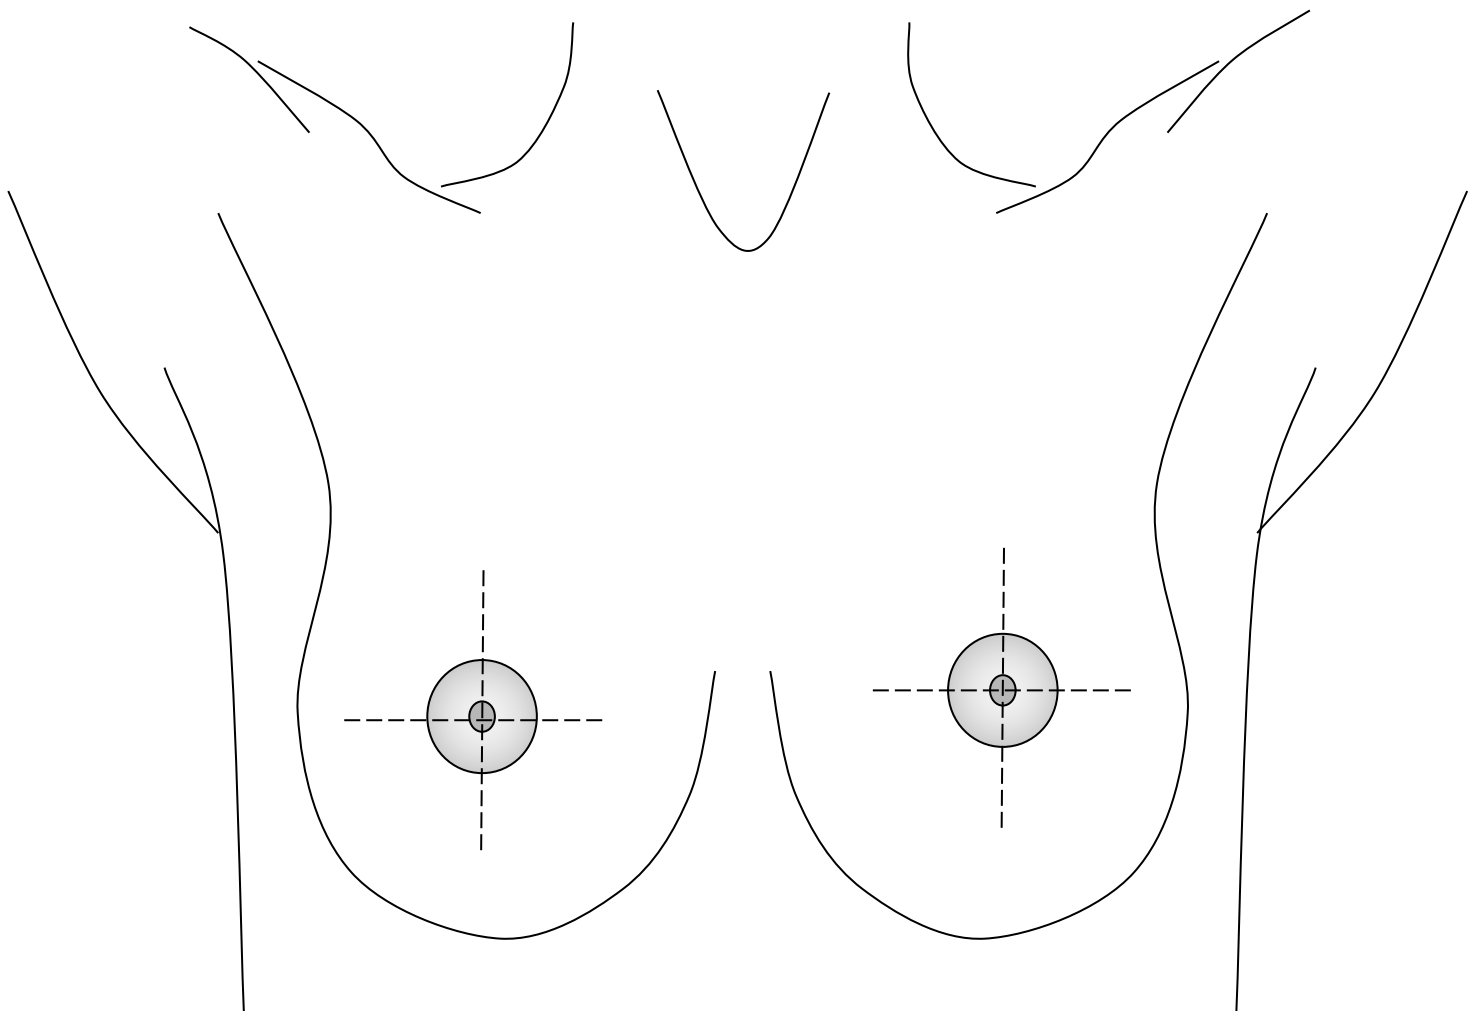

**STOP. Turn this page in to the study coordinator. Then, proceed to the next section (Section 3a) of the survey.**

**Section 3b. Validation of the LSM Look, Feel, Pathologies, and Realism**

***You are evaluating LSM # \_\_\_\_\_. Please, confirm that this is the LSM you are working with.***

**1. Do you agree with the following statements? Use scale provided below.**

|                   |          |                   |                  |                |       |                |
|-------------------|----------|-------------------|------------------|----------------|-------|----------------|
| 1                 | 2        | 3                 | 4                | 5              | 6     | 7              |
| Strongly disagree | Disagree | Somewhat Disagree | Neither/Not sure | Somewhat Agree | Agree | Strongly Agree |

| Statements                                            | 1 | 2 | 3 | 4 | 5 | 6 | 7 |
|-------------------------------------------------------|---|---|---|---|---|---|---|
| <b>General Look and Feel of LSM</b>                   |   |   |   |   |   |   |   |
| 6. The LSM looks like a breastfeeding mother's chest. |   |   |   |   |   |   |   |
| 7. The breast size looks realistic.                   |   |   |   |   |   |   |   |
| 8. The breast shape looks realistic.                  |   |   |   |   |   |   |   |
| 9. The skin color looks realistic.                    |   |   |   |   |   |   |   |
| 10. The skin feels realistic.                         |   |   |   |   |   |   |   |
| <b>Right Breast Look and Feel</b>                     |   |   |   |   |   |   |   |
| 9. The right areolar color looks realistic.           |   |   |   |   |   |   |   |
| 10. The right areolar shape looks realistic.          |   |   |   |   |   |   |   |
| 11. The right areolar size looks realistic.           |   |   |   |   |   |   |   |
| 12. The right nipple color looks realistic.           |   |   |   |   |   |   |   |
| 13. The right nipple feels realistic.                 |   |   |   |   |   |   |   |
| 14. The right nipple shape is realistic.              |   |   |   |   |   |   |   |
| 15. The right nipple size is realistic.               |   |   |   |   |   |   |   |
| 16. The right breast feels realistic.                 |   |   |   |   |   |   |   |
| <b>Left Breast Look and Feel</b>                      |   |   |   |   |   |   |   |
| 9. The left areolar color looks realistic.            |   |   |   |   |   |   |   |
| 10. The left areolar shape looks realistic.           |   |   |   |   |   |   |   |
| 11. The left areolar size looks realistic.            |   |   |   |   |   |   |   |
| 12. The left nipple color looks realistic.            |   |   |   |   |   |   |   |
| 13. The left nipple feels realistic.                  |   |   |   |   |   |   |   |
| 14. The left nipple shape is realistic.               |   |   |   |   |   |   |   |
| 15. The left nipple size is realistic.                |   |   |   |   |   |   |   |
| 16. The left breast feels realistic.                  |   |   |   |   |   |   |   |

|                   |          |                   |                  |                |       |                |
|-------------------|----------|-------------------|------------------|----------------|-------|----------------|
| 1                 | 2        | 3                 | 4                | 5              | 6     | 7              |
| Strongly disagree | Disagree | Somewhat Disagree | Neither/Not sure | Somewhat Agree | Agree | Strongly Agree |

| <b>Statements about Realism of Pathologies</b>                       | <b>1</b> | <b>2</b> | <b>3</b> | <b>4</b> | <b>5</b> | <b>6</b> | <b>7</b> |
|----------------------------------------------------------------------|----------|----------|----------|----------|----------|----------|----------|
| 1. The plugged duct(s) in the <u>left</u> breast feel(s) realistic.  |          |          |          |          |          |          |          |
| 2. The plugged duct(s) in the <u>right</u> breast feel(s) realistic. |          |          |          |          |          |          |          |
| 3. The abscess looks realistic.                                      |          |          |          |          |          |          |          |
| 4. The milk bleb looks realistic.                                    |          |          |          |          |          |          |          |
| 5. The damage on the <u>left</u> nipple looks realistic.             |          |          |          |          |          |          |          |
| 6. The scar on the <u>right</u> breast looks realistic.              |          |          |          |          |          |          |          |
| 7. The scar on the <u>left</u> breast looks realistic.               |          |          |          |          |          |          |          |
| 8. The ectopic tissue looks realistic.                               |          |          |          |          |          |          |          |
| 9. The ectopic tissue feels realistic.                               |          |          |          |          |          |          |          |

| <b>Realism of Breastfeeding Techniques and Experience</b>                                                   | <b>1</b> | <b>2</b> | <b>3</b> | <b>4</b> | <b>5</b> | <b>6</b> | <b>7</b> |
|-------------------------------------------------------------------------------------------------------------|----------|----------|----------|----------|----------|----------|----------|
| <b>Instructions: Put on the LSM.<br/>The study coordinator can help you with adjustment of straps.</b>      |          |          |          |          |          |          |          |
| Putting on the LSM is intuitive.                                                                            |          |          |          |          |          |          |          |
| Wearing the LSM is comfortable.                                                                             |          |          |          |          |          |          |          |
| The weight of the LSM is appropriate.                                                                       |          |          |          |          |          |          |          |
| <b>Instructions: Set the timer for 15 seconds.<br/>Hand express colostrum from the <i>right</i> breast.</b> |          |          |          |          |          |          |          |
| The amount of simulated colostrum I hand expressed in 15 seconds is realistic.                              |          |          |          |          |          |          |          |
| The way that simulated colostrum comes out of the nipple is realistic.                                      |          |          |          |          |          |          |          |
| <b>Instructions: Set the timer for 15 seconds.<br/>Hand express colostrum from the <i>left</i> breast.</b>  |          |          |          |          |          |          |          |
| The amount of simulated colostrum I hand expressed in 15 seconds is realistic                               |          |          |          |          |          |          |          |
| The way that simulated colostrum comes out of the nipple is realistic.                                      |          |          |          |          |          |          |          |

|                   |          |                   |                  |                |       |                |
|-------------------|----------|-------------------|------------------|----------------|-------|----------------|
| 1                 | 2        | 3                 | 4                | 5              | 6     | 7              |
| Strongly disagree | Disagree | Somewhat Disagree | Neither/Not sure | Somewhat Agree | Agree | Strongly Agree |

**Instructions: Use the breast pump to express colostrum from the *right* breast.**

What flange size did you use? *Write number to the right* →

At what setting did you set the pump to observe a realistic movement of breast tissue? Please, describe.

| Statements                                                         | 1 | 2 | 3 | 4 | 5 | 6 | 7 |
|--------------------------------------------------------------------|---|---|---|---|---|---|---|
| The way the breast tissue moves into the breast pump is realistic. |   |   |   |   |   |   |   |
| The way simulated colostrum comes out of the breast is realistic.  |   |   |   |   |   |   |   |

**Instructions: Use the breast pump to express colostrum from the *left* breast.**

What flange size did you use? *Write number to the right* →

At what setting did you set the pump to observe a realistic movement of breast tissue? Please, describe.

| Statements                                                         | 1 | 2 | 3 | 4 | 5 | 6 | 7 |
|--------------------------------------------------------------------|---|---|---|---|---|---|---|
| The way the breast tissue moves into the breast pump is realistic. |   |   |   |   |   |   |   |
| The way simulated colostrum comes out of the breast is realistic.  |   |   |   |   |   |   |   |

**Instructions: Engorge *both* breasts using the black bulbs hanging from the LSM by twisting the knob clockwise. Hand express colostrum from *both* breasts. No need to set a timer.**

| Statements                                                                                                       | 1 | 2 | 3 | 4 | 5 | 6 | 7 |
|------------------------------------------------------------------------------------------------------------------|---|---|---|---|---|---|---|
| The engorgement looks realistic.                                                                                 |   |   |   |   |   |   |   |
| The engorgement feels realistic.                                                                                 |   |   |   |   |   |   |   |
| The way that simulated colostrum comes out of the <i>engorged right</i> breast when I hand express is realistic. |   |   |   |   |   |   |   |
| The way that simulated colostrum comes out of the <i>engorged left</i> breast when I hand express is realistic.  |   |   |   |   |   |   |   |

|                   |          |                   |                  |                |       |                |
|-------------------|----------|-------------------|------------------|----------------|-------|----------------|
| 1                 | 2        | 3                 | 4                | 5              | 6     | 7              |
| Strongly disagree | Disagree | Somewhat Disagree | Neither/Not sure | Somewhat Agree | Agree | Strongly Agree |

| <b>Instructions: Remove the LSM and complete the rest of the questionnaire.</b> |  |  |  |  |  |  |   |   |   |   |   |   |   |  |
|---------------------------------------------------------------------------------|--|--|--|--|--|--|---|---|---|---|---|---|---|--|
| <b>Realism of Experience (continued)</b>                                        |  |  |  |  |  |  | 1 | 2 | 3 | 4 | 5 | 6 | 7 |  |
| Removing the LSM from my body is intuitive.                                     |  |  |  |  |  |  |   |   |   |   |   |   |   |  |
| The LSM allowed me to practice correct positioning and movement of my hands.    |  |  |  |  |  |  |   |   |   |   |   |   |   |  |
| <b>This</b> LSM is a useful tool for health professional student education.     |  |  |  |  |  |  |   |   |   |   |   |   |   |  |
| <b>This</b> LSM is a useful tool for hospital staff education.                  |  |  |  |  |  |  |   |   |   |   |   |   |   |  |
| <b>This</b> LSM is a useful tool for patient education.                         |  |  |  |  |  |  |   |   |   |   |   |   |   |  |

What features/improvements should be incorporated into LSM (# \_\_\_\_\_)?

What did you like about this LSM (# \_\_\_\_\_)?

What did you dislike about this LSM (# \_\_\_\_\_)?

**This is the end of Questionnaire. Thank you for your time and feedback! Please, return this survey packet to the study coordinator and confirm your email to receive the \$10.00 Amazon gift card.**
